# Supplementary material
Source: PubMed Central journal article supplement (PMC3137714)
Supplement: NIHMS297063-supplement-1.pdf [file NIHMS297063-supplement-1.pdf]

## Appendix

| Endpoints                                             | Baseline Predictors                                                                                                                                                                                                                                                                                                                                                                                                                                            |
|-------------------------------------------------------|----------------------------------------------------------------------------------------------------------------------------------------------------------------------------------------------------------------------------------------------------------------------------------------------------------------------------------------------------------------------------------------------------------------------------------------------------------------|
| All-Cause Death or All-Cause Hospitalization          | Peak VO <sub>2</sub> characterized by Weber class<br>Kansas City Cardiomyopathy Questionnaire symptom stability score<br>Blood urea nitrogen level<br>Country (U.S. or non-U.S.)<br>Left ventricular ejection fraction<br>Sex<br>Dosage of beta blocker<br>Mitral regurgitation grade<br>Ventricular conduction prior to the baseline<br>Cardiopulmonary Exercise test                                                                                         |
| All-Cause Death                                       | Exercise duration on the baseline Cardiopulmonary Exercise test<br>Serum creatinine level<br>Body Mass Index<br>Sex<br>Dosage of loop diuretic<br>Left ventricular ejection fraction<br>Canadian Cardiovascular Society angina classification<br>Ventricular conduction prior to the baseline<br>Cardiopulmonary Exercise test                                                                                                                                 |
| CV Death or CV Hospitalization                        | Left ventricular ejection fraction<br>Mitral regurgitation grade<br>Ventricular conduction prior to the baseline<br>Cardiopulmonary Exercise test<br>KCCQ symptom stability score<br>Blood urea nitrogen level<br>Race<br>Heart rate at peak exercise on the baseline<br>Cardiopulmonary Exercise test<br>Sex<br>Baseline use of nitrates<br>Peak VO <sub>2</sub> characterized by Weber class<br>Kansas City Cardiomyopathy Questionnaire total symptom score |
| Cardiovascular Death or Heart Failure Hospitalization | Dosage of loop diuretic<br>Left ventricular ejection fraction<br>Mitral regurgitation grade<br>Ventricular conduction prior to the baseline<br>Cardiopulmonary Exercise test<br>Kansas City Cardiomyopathy Questionnaire symptom stability score<br>Blood urea nitrogen level<br>Race                                                                                                                                                                          |

Sex  
Age  
Peak  $\text{VO}_2$   
Relationship between minute ventilation and carbon dioxide  
production on CPX test ( $\text{VE}/\text{VCO}_2$ )

---

Baseline predictors for primary and secondary endpoints that were selected using a stepwise variable selection based on a bootstrap-backward selection process.
